# Supplementary material for: A spectroscopic study on the formation of Cm(iii) acetate complexes at elevated temperatures
Source: Royal Society of Chemistry journal article supplement (doi:10.1039/c3dt52989d), 2013-12-19
Supplement: c3dt52989d.pdf [file c3dt52989d.pdf]

# A spectroscopic study on the formation of Cm(III) acetate complexes at elevated temperatures

## Supporting information

*Daniel R. Fröhlich<sup>\*†</sup>, Andrej Skerencak-Frech<sup>‡</sup>, Petra J. Panak<sup>‡‡</sup>*

<sup>†</sup> Ruprecht-Karls-Universität Heidelberg, Physikalisch-Chemisches Institut, Im Neuenheimer  
Feld 253, 69120 Heidelberg, Germany

<sup>‡</sup> Karlsruher Institut für Technologie, Institut für Nukleare Entsorgung, P.O. Box 3640, 76021  
Karlsruhe, Germany

\* E-mail: [daniel.froehlich@partner.kit.edu](mailto:daniel.froehlich@partner.kit.edu)

### Calculation of the free ligand concentration

The free ligand concentration is calculated as performed in our previous studies treating the interaction of Cm(III) with propionate.<sup>21,22</sup> There, we showed that the complexation of Na<sup>+</sup> by propionate is negligible.<sup>21,22</sup> Due to the similar chemical properties, NaAc is also assumed to be fully dissociated under the present experimental conditions. Following these approximations, the free acetate concentration in NaCl and NaClO<sub>4</sub> solution is calculated according to the following equation which has been deduced in a previous work:<sup>21</sup>

$$[Ac^-]_{eq}(T) = \frac{-\left([H^+]_{total} - [Ac^-]_{total} + K'_{HAc}(T)\right)}{2} + \frac{\sqrt{\left([H^+]_{total} - [Ac^-]_{total} + K'_{HAc}(T)\right)^2 + 4 \cdot [Ac^-]_{total} \cdot K'_{HAc}(T)}}{2}$$

$[H^+]_{total}$  and  $[Ac^-]_{total}$  are the total concentrations of protons and acetate, respectively.  $K'_{HAc}(T)$  is the conditional dissociation constant of acetic acid as a function of temperature at a given ionic strength and is calculated according to the following equation:

$$K'_{HAc}(T) = K^0_{HAc}(T) \cdot \frac{\gamma_{HAc}(T)}{\gamma_{H^+}(T) \cdot \gamma_{Ac^-}(T)}$$

$K^0_{HAc}(T)$  at a given temperature is calculated from  $\log K^0_{HAc}(25\text{ }^\circ\text{C}) = -4.757$  and  $\Delta_r H^0_m = -0.41$  kJ/mol (both values given in the NIST database 46.6)<sup>24</sup> using the integrated Van't Hoff equation. The activity coefficients ( $\gamma(T)$ ) are determined according to the specific ion interaction theory which is recommended in the NEA thermodynamic database (TDB).<sup>7</sup> Within the SIT-approach, ion interaction coefficients ( $\epsilon$ ) are introduced to describe the non-electrostatic, short-range interaction between ions of opposite charge. This procedure is valid for ionic strengths up to 4 mol/kg H<sub>2</sub>O. Within the temperature range studied in the present work it is appropriate to use temperature-independent coefficients for 25 °C.<sup>7</sup> The required  $\epsilon$ -values ( $\epsilon(H^+, ClO_4^-) = 0.14 \pm 0.02$ ,  $\epsilon(H^+, Cl^-) = 0.12 \pm 0.01$  and  $\epsilon(Na^+, Ac^-) = 0.08 \pm 0.01$ ) are tabulated in the NEA-TDB.<sup>7</sup>

In the case of CaCl<sub>2</sub> as background electrolyte, the interaction between Ca<sup>2+</sup> and Ac<sup>-</sup> has to be taken into account. The required conditional stability constants  $K'_{CaAc^+}(T)$  is calculated from  $\log K^0_{CaAc^+}(25\text{ }^\circ\text{C}) = 1.18$  and  $\Delta_r H^0_m = 4$  kJ/mol (both values given in the NIST database 46.6)<sup>24</sup>. Considering CaAc<sup>+</sup> formation, the free acetate concentration in solution is a function of the initial Ca<sup>2+</sup> concentration and  $K'_{CaAc^+}(T)$ . The mathematical expression to calculate the free ligand concentration in CaCl<sub>2</sub> solution has already been deduced in our previous work on Cm(III)-propionate complexation.<sup>22</sup> In the context of this work, the required ion interaction coefficients  $\epsilon(Ca^{2+}, Ac^-) = 0.27 \pm 0.20$  and  $\epsilon(CaAc^+, Cl^-) = 0.21 \pm 0.10$  were derived.<sup>22</sup>  $\epsilon(Ca^{2+}, Cl^-) = 0.14 \pm 0.01$  is tabulated in the NEA TDB.<sup>7</sup>

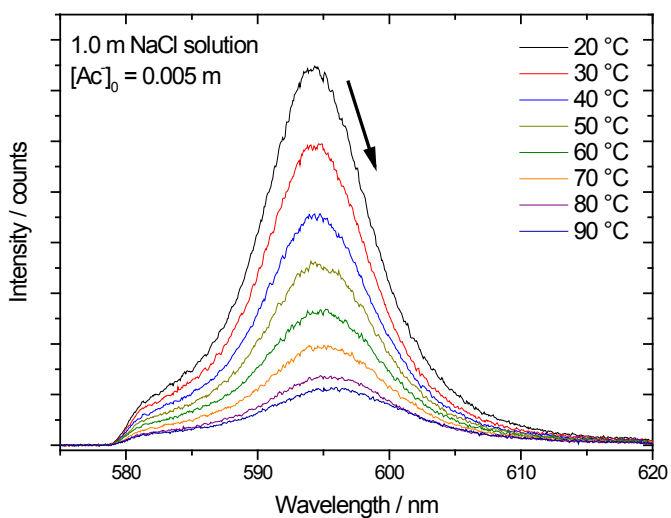

**Figure S1.** Emission spectra of Cm(III) in 1.0 m NaCl solution in the presence of 0.005 m acetate as a function of temperature (20-90 °C).

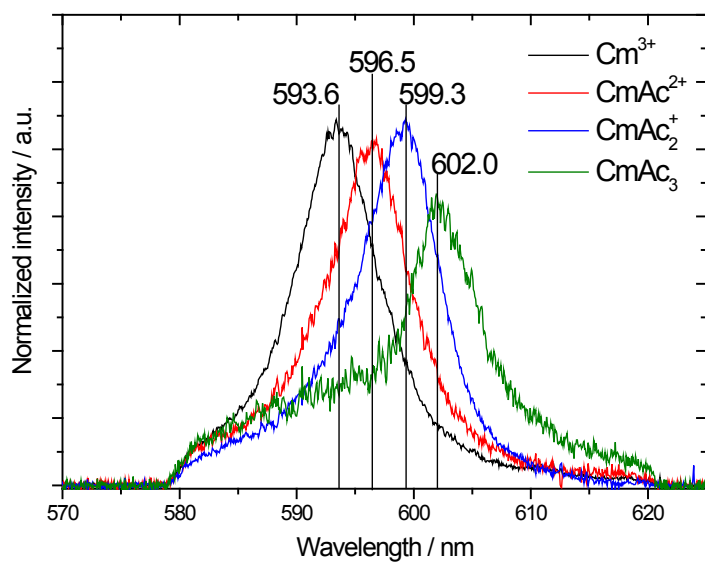

**Figure S2.** Pure component spectra of  $\text{Cm(III)}_{\text{aq}}$  and  $\text{Cm(Ac)}_n^{3-n}$  ( $n = 1-3$ ) obtained by peak deconvolution.

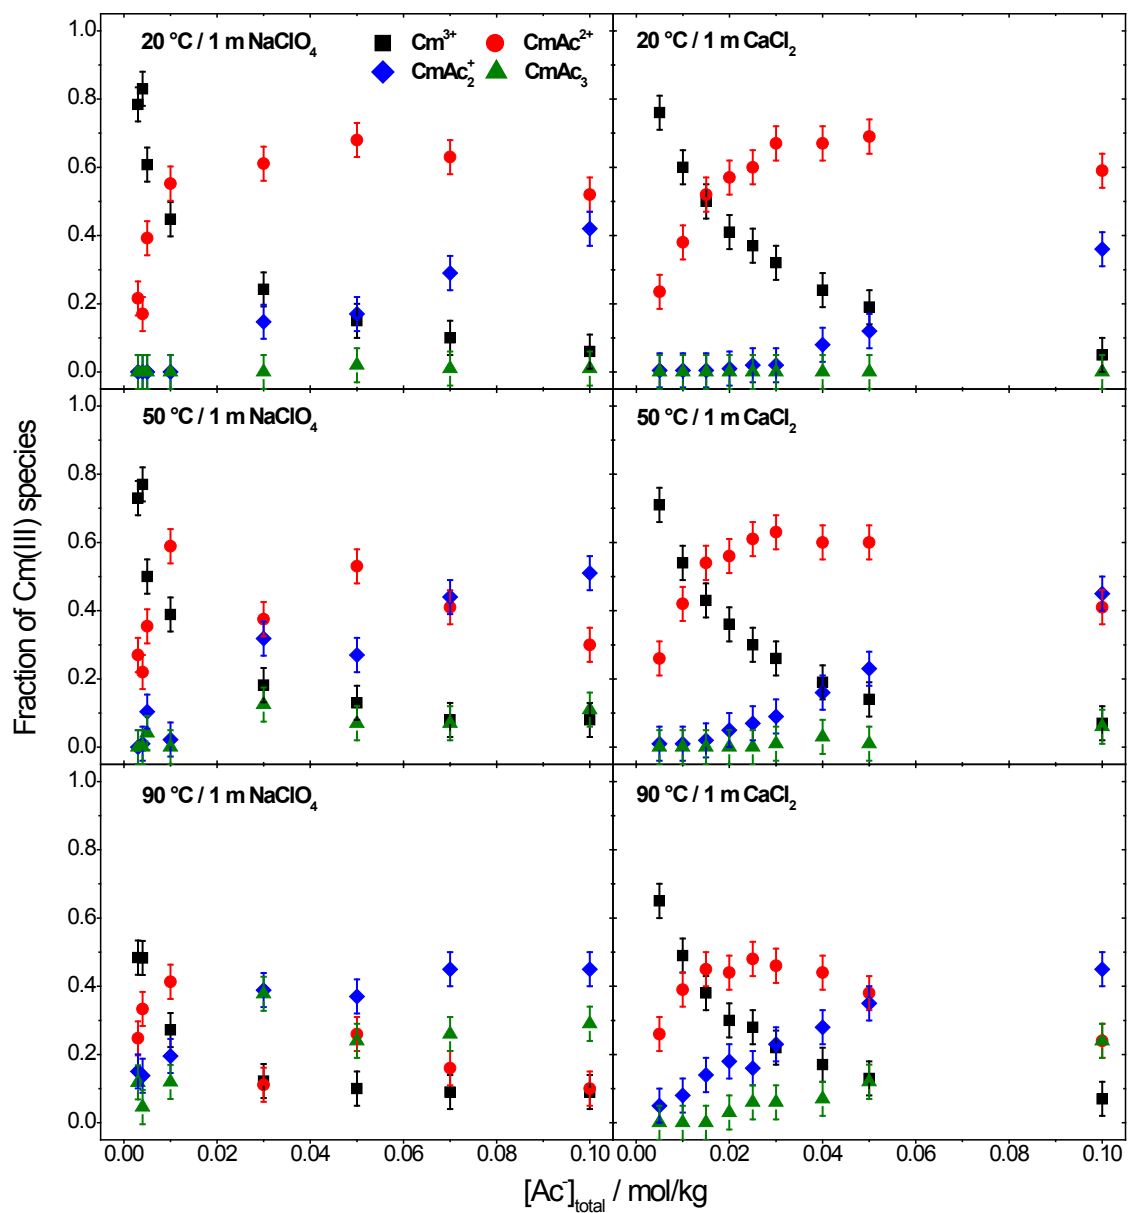

**Figure S3.** Cm(III) speciation as a function of the initial acetate concentration and temperature (20, 50, 90 °C) in 1 m NaClO<sub>4</sub> and CaCl<sub>2</sub> solution. The error bars equal an absolute error of 5% for each species.

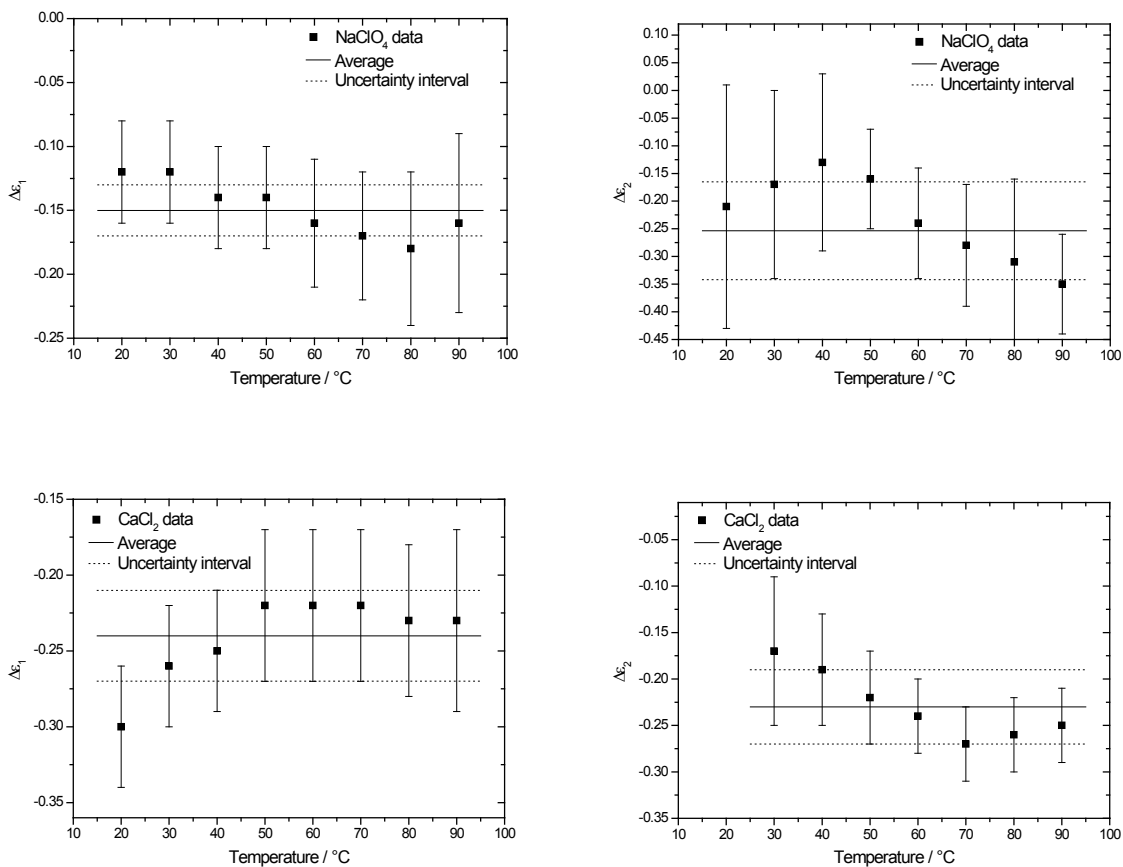

**Figure S4.**  $\Delta\epsilon_n$  values ( $n = 1, 2$ ) for the formation of  $[\text{Cm}(\text{Ac})_n]^{3-n}$  in  $\text{NaClO}_4$  and  $\text{CaCl}_2$  solution as a function of the temperature. The error bars equal the  $2\sigma$  errors of the linear regressions.

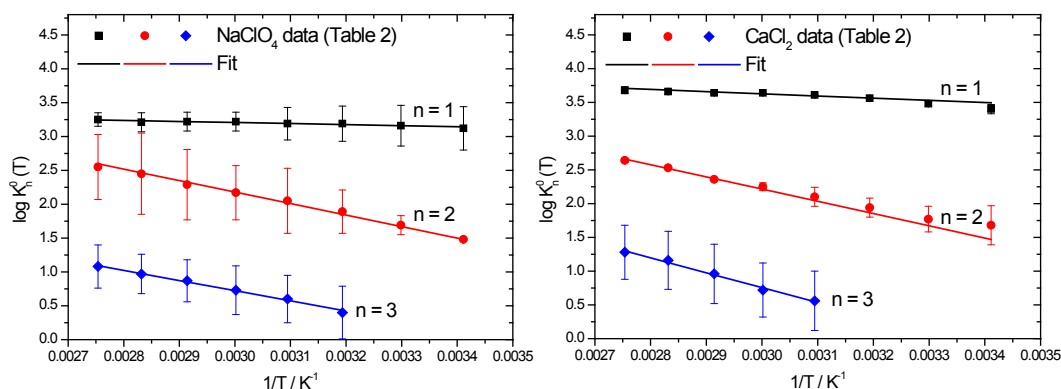

**Figure S5.** Arrhenius plot of  $\log K_n^0$  ( $n = 1-3$ ) obtained in  $\text{NaClO}_4$  and  $\text{CaCl}_2$  solution (values and errors given in Table 2) to determine the thermodynamic data ( $\Delta_r H_m^0$  and  $\Delta_r S_m^0$ ).

**Table S1.** Result of the slope analysis for the formation of  $[\text{Cm}(\text{Ac})_n]^{3-n}$  ( $n = 1-3$ ) in  $\text{NaClO}_4$ ,  $\text{NaCl}$  and  $\text{CaCl}_2$  solution in the temperature range of 20-90 °C.

| T / °C | Result of slope analysis for the formation of $[\text{Cm}(\text{Ac})_n]^{3-n}$ |                 |                 |                 |                 |                 |                 |                 |
|--------|--------------------------------------------------------------------------------|-----------------|-----------------|-----------------|-----------------|-----------------|-----------------|-----------------|
|        | $\text{NaClO}_4$                                                               |                 |                 | $\text{NaCl}$   |                 |                 | $\text{CaCl}_2$ |                 |
|        | n = 1                                                                          | n = 2           | n = 3           | n = 1           | n = 2           | n = 3           | n = 1           | n = 2           |
| 20     | $1.09 \pm 0.11$                                                                | -               | -               | $0.97 \pm 0.08$ | -               | -               | $1.02 \pm 0.10$ | -               |
| 30     | $1.11 \pm 0.11$                                                                | $1.09 \pm 0.17$ | -               | $0.98 \pm 0.08$ | -               | -               | $1.03 \pm 0.10$ | -               |
| 40     | $1.09 \pm 0.12$                                                                | $1.01 \pm 0.13$ | -               | $0.99 \pm 0.08$ | $1.13 \pm 0.44$ | -               | $1.05 \pm 0.11$ | -               |
| 50     | $1.07 \pm 0.12$                                                                | $0.84 \pm 0.13$ | $0.84 \pm 0.50$ | $1.00 \pm 0.08$ | $1.08 \pm 0.15$ | $0.88 \pm 0.29$ | $1.00 \pm 0.11$ | $1.18 \pm 0.17$ |
| 60     | $0.89 \pm 0.13$                                                                | $0.89 \pm 0.19$ | $0.75 \pm 0.26$ | $1.00 \pm 0.10$ | $1.15 \pm 0.16$ | $0.78 \pm 0.22$ | $0.96 \pm 0.11$ | $1.13 \pm 0.15$ |
| 70     | $0.90 \pm 0.14$                                                                | $0.76 \pm 0.21$ | $0.69 \pm 0.40$ | $0.92 \pm 0.10$ | $0.92 \pm 0.15$ | $0.88 \pm 0.20$ | $0.91 \pm 0.11$ | $1.21 \pm 0.15$ |
| 80     | $0.95 \pm 0.17$                                                                | $1.06 \pm 0.15$ | $0.80 \pm 0.38$ | $0.87 \pm 0.11$ | $0.99 \pm 0.20$ | $0.60 \pm 0.17$ | $0.84 \pm 0.11$ | $1.04 \pm 0.14$ |
| 90     | $0.80 \pm 0.19$                                                                | $0.90 \pm 0.14$ | $0.76 \pm 0.38$ | $0.83 \pm 0.12$ | $0.91 \pm 0.08$ | $0.65 \pm 0.17$ | $0.85 \pm 0.12$ | $0.95 \pm 0.14$ |
